# Supplementary material for: Non-invasive prenatal detection of trisomy 21 by quantifying segmental duplication in maternal plasma with digital PCR
Source: Royal Society of Chemistry journal article supplement (doi:10.1039/c6ay00122j), 2016-01-01
Supplement: c6ay00122j1.pdf [file c6ay00122j1.pdf]

## Supporting Information

**Table S1** Primers, probes and SD used in SD-Digital-PCR for T21 detection

| Oligonucleotide  | Sequences (5' to 3')                                                                                      |
|------------------|-----------------------------------------------------------------------------------------------------------|
| SD-Digital-PCR-F | GTTGTTCTGCAAAAAACCTTCGA                                                                                   |
| SD-Digital-PCR-R | CTTGCCAGAAATACTTCATTACCATAT                                                                               |
| chr21-probe      | FAM-TACCTCCATAATGAGTAAA-MGBNFQ                                                                            |
| chr1-probe       | VIC-CGTACCTCTGTAATGTGTAA-MGBNFQ                                                                           |
| SD-chr21         | GTTGTTCTGCAAAAAACCTTCGAGATATTGATGAAGTCTCATCTCTACTTCGTACCTCCATAATGA<br>GTAAACAATATGGTAATGAAGTATTTCTGGCCAAG |
| SD-chr1          | GTTGTTCTGCAAAAAACCTTCGAGATGTTGATGAAGTCTCATCTCTACTTCGTACCTCTGTAATGT<br>GTAAACAATATGGTAATGAAGTATTTCTGGCCAAG |

**Table S2** The expected and observed ratios of chr21 / (chr1+chr21) in the case of 0%, 3%, 10%, 15%, 20%, 25%, 50%, 100% T21-fetal DNA samples

| Sample   | Expected ratio<br>( $m = 0.5$ ) | Observed ratio | mean value $\pm$ SD, n | p-value<br>with<br>0%T21 | 95% CI Cut-off value<br>(mean $\pm$ 1.96 $\times$ SD) |
|----------|---------------------------------|----------------|------------------------|--------------------------|-------------------------------------------------------|
| 100% T21 | 0.5728                          | 0.5737         | 0.5654 $\pm$ 0.008, 3  | 0.0010                   | [0.5506,0.5801]                                       |
|          |                                 | 0.5591         |                        |                          |                                                       |
|          |                                 | 0.5633         |                        |                          |                                                       |
| 50% T21  | 0.5415                          | 0.5404         | 0.5344 $\pm$ 0.005, 3  | 0.0007                   | [0.5243, 0.5446]                                      |
|          |                                 | 0.5316         |                        |                          |                                                       |
|          |                                 | 0.5313         |                        |                          |                                                       |
| 25% T21  | 0.5223                          | 0.5205         | 0.5197 $\pm$ 0.003, 3  | 0.0004                   | [0.5134,0.5260]                                       |
|          |                                 | 0.5162         |                        |                          |                                                       |
|          |                                 | 0.5225         |                        |                          |                                                       |
| 20%T21   | 0.5181                          | 0.5103         | 0.5159 $\pm$ 0.005, 3  | 0.0032                   | [0.5063,0.5255]                                       |
|          |                                 | 0.5194         |                        |                          |                                                       |
|          |                                 | 0.5180         |                        |                          |                                                       |
| 15%T21   | 0.5138                          | 0.5156         | 0.5112 $\pm$ 0.004, 3  | 0.0026                   | [0.5036,0.5188]                                       |
|          |                                 | 0.5096         |                        |                          |                                                       |
|          |                                 | 0.5084         |                        |                          |                                                       |
| 10%T21   | 0.5093                          | 0.5097         | 0.5073 $\pm$ 0.003, 3  | 0.0029                   | [0.5020,0.5125]                                       |
|          |                                 | 0.5077         |                        |                          |                                                       |
|          |                                 | 0.5044         |                        |                          |                                                       |
| 3%T21    | 0.5029                          | 0.4996         | 0.4972 $\pm$ 0.002, 3  | 0.0614                   | [0.4927,0.5017]                                       |
|          |                                 | 0.4970         |                        |                          |                                                       |
|          |                                 | 0.4950         |                        |                          |                                                       |
| 0%T21    | 0.5000                          | 0.4944         | 0.4911 $\pm$ 0.003, 3  | /                        | [0.4848, 0.4974]                                      |
|          |                                 | 0.4909         |                        |                          |                                                       |
|          |                                 | 0.4880         |                        |                          |                                                       |

**Table S3** The ratio of chr21 / (chr1+chr21) from clinical samples

| Sample | Sample type | ChrY (copies/ $\mu$ L) | Chr1 (copies/ $\mu$ L) | Fetal DNA% | Templates copies | $m$    | Expected ratio | Measured ratio |
|--------|-------------|------------------------|------------------------|------------|------------------|--------|----------------|----------------|
| 1      | Euploid 21  | 374.3                  | 738.0                  | 50.72%     | 3690             | 0.1845 | 0.5            | 0.5006         |
| 2      | Euploid 21  | 380.0                  | 791.5                  | 48.01%     | 3957.5           | 0.1979 | 0.5            | 0.4892         |
| 3      | Euploid 21  | 367.1                  | 750.0                  | 48.95%     | 3750             | 0.1875 | 0.5            | 0.4991         |
| 4      | Euploid 21  | 325.1                  | 700.2                  | 46.43%     | 3501             | 0.1751 | 0.5            | 0.4925         |
| 5      | Euploid 21  | 241.0                  | 680.0                  | 35.44%     | 3400             | 0.1700 | 0.5            | 0.4930         |
| 6      | Euploid 21  | 329.6                  | 840.0                  | 39.24%     | 4200             | 0.2100 | 0.5            | 0.4968         |
| 7      | Euploid 21  | 269.5                  | 545.0                  | 49.45%     | 2725             | 0.1363 | 0.5            | 0.4990         |
| 8      | Euploid 21  | 238.5                  | 670.0                  | 35.60%     | 3350             | 0.1675 | 0.5            | 0.4961         |
| 9      | Euploid 21  | 385.9                  | 850.0                  | 45.40%     | 4250             | 0.2125 | 0.5            | 0.4868         |
| 10     | Euploid 21  | /                      | 339.4                  | /          | 1697             | 0.0849 | /              | 0.4948         |
| 11     | Euploid 21  | /                      | 156.6                  | /          | 783              | 0.0392 | /              | 0.4955         |
| 12     | Euploid 21  | /                      | 480.6                  | /          | 2403             | 0.1202 | /              | 0.4973         |
| 13     | Trisomy 21  | 237.0                  | 598.5                  | 39.60%     | 2992.5           | 0.1496 | 0.5415         | 0.5405         |
| 14     | Trisomy 21  | /                      | 375.5                  | /          | 1877.5           | 0.0939 | /              | 0.5667         |
| 15     | Trisomy 21  | /                      | 71.3                   | /          | 356.5            | 0.0178 | /              | 0.5523         |

The real-time PCR amplification was performed using Rotor-Gene Q Real-Time PCR (QIAGEN) in a total reaction volume of 20  $\mu$ L containing 2 $\times$ SYBR<sup>®</sup> *Premix Ex Taq*<sup>™</sup> (TaKaRa), template and 200  $\mu$ M of each primers (chr1-F: 5'-TGCCATGCAACTACTGAAGAGGA, chr1-R: 5'-GTGACAAATGATGCAGCGACTA, chrY-F: 5'-CAGGCAGGACAGCTTAAAAG, chrY-F: 5'-ACTGTGGCAAAGTTGCTTTC). The reaction mixture was preheated at 95 °C for 3 mins, followed by 40 cycles of 15 secs at 95 °C, 60 secs at 60 °C, and a final extension step at 72 °C for 7minutes.
